# Supplementary material for: AtCRY2 Negatively Regulates the Functions of AtANN2 and AtANN3 in Drought Tolerance by Affecting Their Subcellular Localization and Transmembrane Ca2+ Flow
Source: Front Plant Sci. 2021 Nov 23;12:754567. doi: 10.3389/fpls.2021.754567 (PMC8649957; doi:10.3389/fpls.2021.754567)
Supplement: Supplementary file 4 [file Table_1.XLSX]

## Sheet: List1
Gene	AGI	Name	Forward primer	Reverse primer
AtANN2	AT5G65020	SALK_054223-DNA-LP-RP	TGGGATCAATCTTTTGGTCTG	GATGCTTGCAAGATCTGAAGC
AtANN2	AT5G65020	SALK_054223-DNA-LB-RP	ATTTTGCCGATTTCGGAAC	GATGCTTGCAAGATCTGAAGC
AtANN3	AT2G38760	SALK_082344-DNA-LP-RP	TCCTCAAAACGAAAAATCTCG	CATAGCCGCCTCAATAGTAGC
AtANN3	AT2G38760	SALK_082344-DNA-LB-RP	ATTTTGCCGATTTCGGAAC	CATAGCCGCCTCAATAGTAGC
AtANN2	AT5G65020	AtANN2-RNA	GAAGATGACGCCGAGCAACTC	CCATGTCCGAGAAGAGCAACAA
AtANN2	AT5G65020	AtANN2-Gene Expression Analysis	GACGAATGGGGACTAACCCG	ACGGTCCAAAGGAATGCTGTRT
AtANN2	AT5G65020	AtANN2-Subcellular Localization Assay	ACTAGGGTCTCGCACCATGGCGTCTCTCAAAGTCCC	ACTAGGGTCTCTCGCCAGCATCGCCATGTCCGAGAA
AtANN2	AT5G65020	AtANN2-pull-down	GAGCTGCATGTGTCAGAGG	GCAAGCCACGTTTGGTG
AtANN2	AT5G65020	AtANN2-BiFC	ACTAGGGTCTCGCAGCATGGCGTCTCTCAAAGTCCC	ACTAGGGTCTCTACCGTCAAGCATCGCCATGTCCGA
AtANN3	AT2G38760	AtANN3-RNA	GTTCCTTCTCCAGCTCAGGATT	GAAGTCCTTGTAGTCTCCAGAAAT
AtANN3	AT2G38760	AtANN3-Gene Expression Analysis	ATAGGACTGATGCAGAAGTAGC	TTGCCACCTTCAATAGACTTCT
AtANN3	AT2G38760	AtANN3-Subcellular Localization Assay	ACTAGGGTCTCGCACCATGGCCACCATTAGAGTACC	ACTAGGGTCTCTCGCCGATTTTGGATCCAAGTAAGGTGAT
AtANN3	AT2G38760	AtANN3-pull-down	GAGCTGCATGTGTCAGAGG	GCAAGCCACGTTTGGTG
AtANN3	AT2G38760	AtANN3-BiFC	ACTAGGGTCTCGCAGCATGGCCACCATTAGAGTACC	ACTAGGGTCTCTACCGTCAGATTTTGGATCCAAGTAAGGTG
AtCRY2	AT1G04400	AtCRY2-pull-down	TAATACGACTCACTATAGG	GCTAgTTATTGCTCAgCGG
AtCRY2	AT1G04400	AtCRY2-BiFC	ACTAGGGTCTCGCACCATGAAGATGGACAAAAAGACTATAGTTTGGT	ACTAGGGTCTCTCGGATTTGCAACCATTTTTTCCCAAACTTGTA
AtACT2	AT3G18780	AtACT2-RNA--Gene Expression Analysis	GCACCCTGTTCTTCTTACCGAG	AGTAAGGTCACGTCCAGCAAGG
